# Supplementary material
Source: PubMed Central journal article supplement (PMC123156)

**A**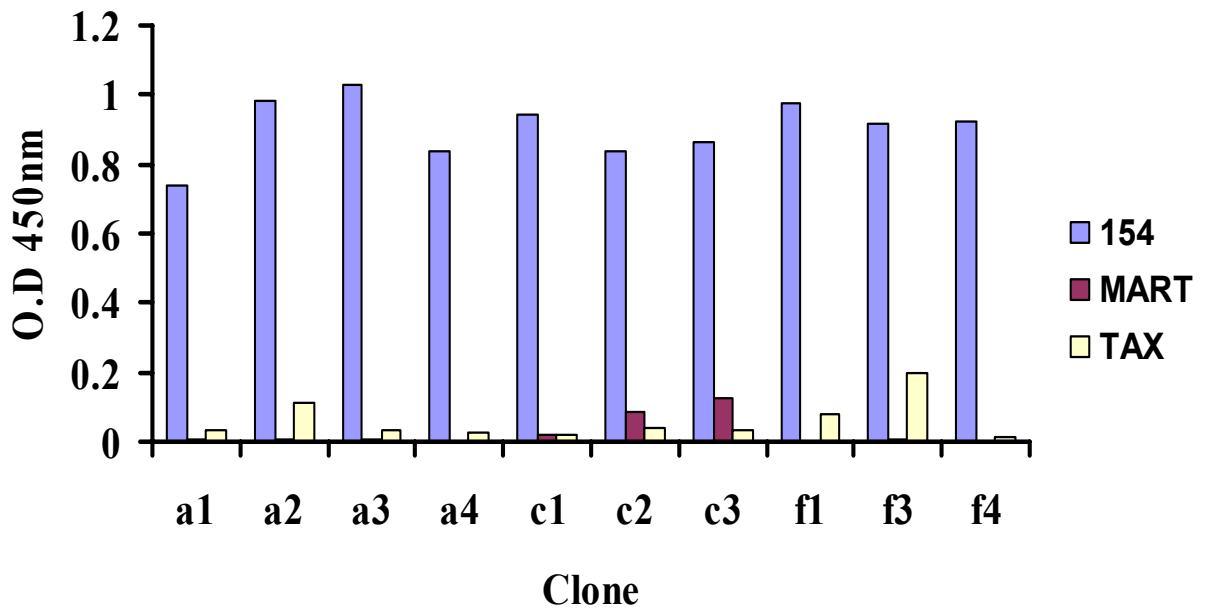**B**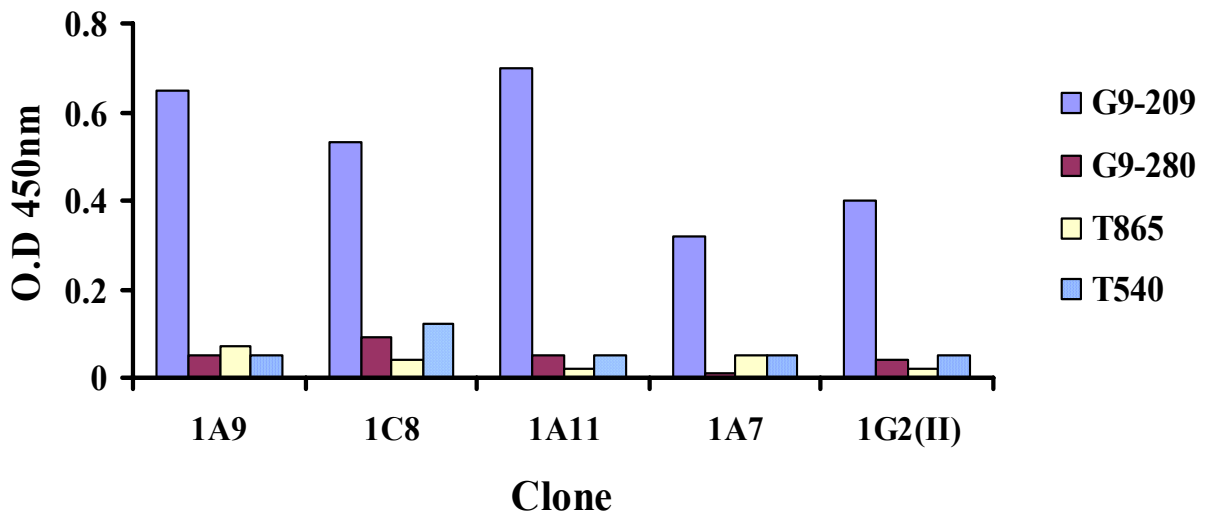**C**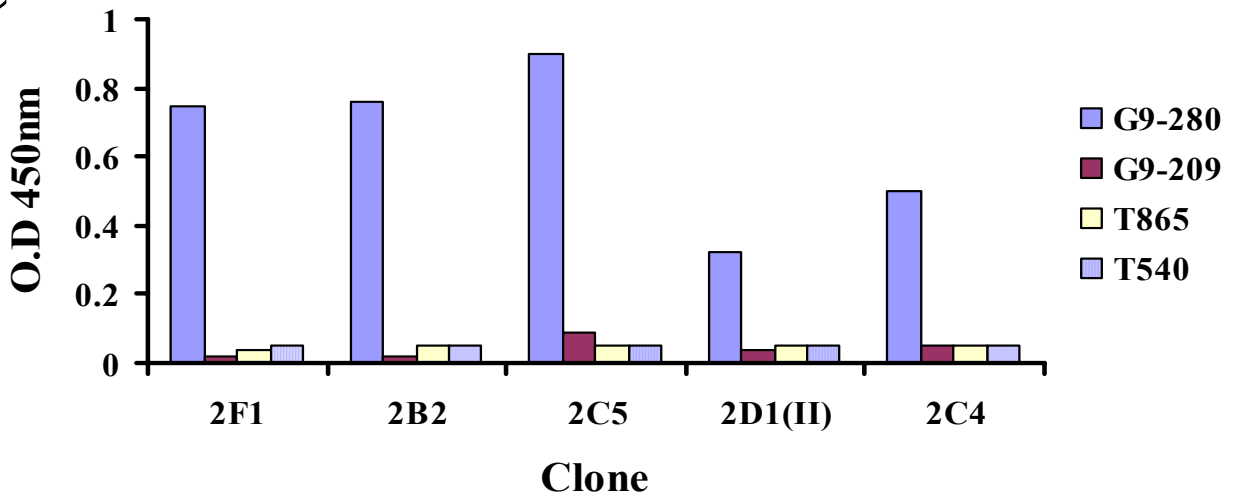

Supplement: supp_132285699_2856Fig5.pdf [file supp_132285699_2856Fig5.pdf]

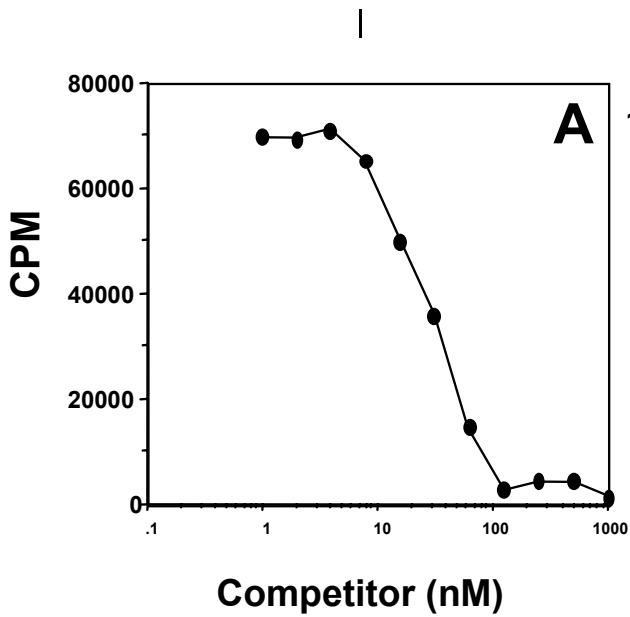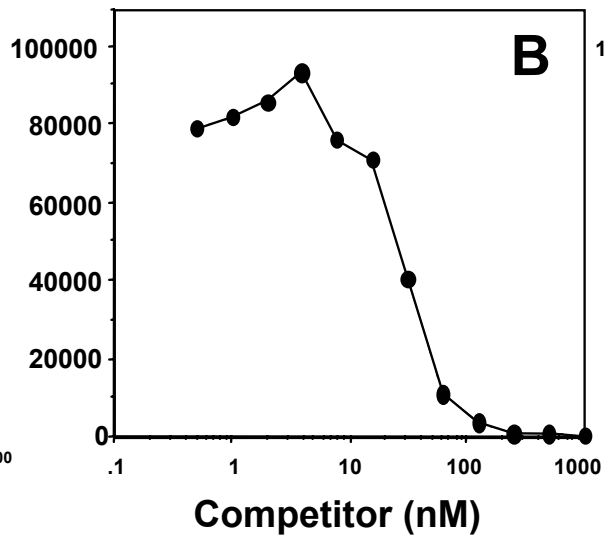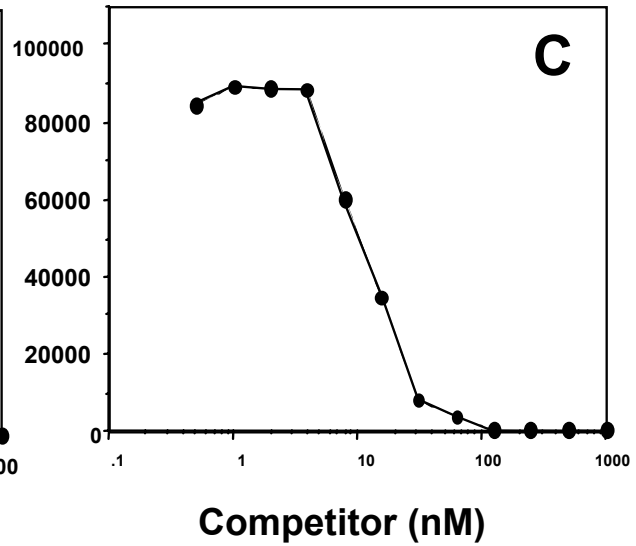

Supplement: supp_132285699_2856Fig6.pdf [file supp_132285699_2856Fig6.pdf]
